# Supplementary material for: Concept of the Number Needed to Treat for the Analysis of Pain Relief Outcomes in Patients Treated with Spinal Cord Stimulation
Source: MDPI journal article supplement (doi:10.3390/biomedicines10020497), 2022-02-20
Supplement: s1 [file s1]

# Supplementary Information

**Table S1.** Data extracted from controlled trials for the ITT and PP populations.

| Study/Article ID             | Design                         | Treatment group (TG) | Control group (CG) | Follow-up time | Pain area  | Responder rate/Total Nonresponders ITT population | N/# Responders/PP population             |
|------------------------------|--------------------------------|----------------------|--------------------|----------------|------------|---------------------------------------------------|------------------------------------------|
| North 2005 (32)              | RCT (open-label)               | t-SCS                | Reoperation        | 2.9 Yr         | Comb. pain | TG: 30.0%/30/9/21<br>CG: 10.0%/30/3/27            | TG: 47.4%/19/9/10<br>CG: 11.5%/26/3/23   |
| PROCESS: Kumar 2007 (30)     | RCT (open-label)               | t-SCS                | CMM                | 3 Mo           | Leg pain   | TG: 53.8%/52/28/24<br>CG: 8.3%/48/4/44            | TG: 56.0%/50/28/22<br>CG: 9.1%/44/4/40   |
| PROCESS: Kumar 2007 (30)     | RCT (open-label)               | t-SCS                | CMM                | 6 Mo           | Leg pain   | TG: 46.2%/52/24/28<br>CG: 8.3%/48/4/44            | TG: 48.0%/50/24/26<br>CG: 9.1%/44/4/40   |
| PROCESS: Kumar 2007 (30)     | RCT (open-label)               | t-SCS                | CMM                | 12 Mo          | Leg pain   | TG: 30.8%/52/16/36<br>CG: 6.3%/48/3/45            | TG: 34.0%/47/16/31<br>CG: 7.3%/41/3/38   |
| PROCESS: Kumar 2008 (33)     | RCT (open-label)               | t-SCS                | CMM                | 24 Mo          | Leg pain   | TG: 32.7%/52/17/35<br>CG: 2.1%/48/1/47            | TG: 37.0%/46/17/29<br>CG: 2.4%/41/1/40   |
| Turner 2010 (42)             | Controlled cohort (open-label) | t-SCS                | PCM                | 6 Mo           | Leg pain   | TG: 17.6%/51/9/42<br>CG: 5.1%/39/2/37             | TG: 17.6%/51/9/42<br>CG: 5.3%/38/2/36    |
| Turner 2010 (42)             | Controlled cohort (open-label) | t-SCS                | PCM                | 12 Mo          | Leg pain   | TG: 13.7%/51/7/44<br>CG: 7.7%/39/3/36             | TG: 14.9%/47/7/40<br>CG: 8.3%/36/3/33    |
| Turner 2010 (42)             | Controlled cohort (open-label) | t-SCS                | PCM                | 24 Mo          | Leg pain   | TG: 13.7%/51/7/44<br>CG: 12.8%/39/5/34            | TG: 16.3%/43/7/36<br>CG: 14.7%/34/5/29   |
| SENZA-RCT: Kapural 2015 (34) | RCT (open-label)               | 10 kHz SCS           | t-SCS              | 3 Mo           | Back pain  | TG: 74.3%/101/75/26<br>CG: 36.1%/97/35/62         | TG: 84.3%/89/75/14<br>CG: 43.8%/80/35/45 |
| SENZA-RCT: Kapural 2015 (34) | RCT (open-label)               | 10 kHz SCS           | t-SCS              | 3 Mo           | Leg pain   | TG: 73.3%/101/74/27<br>CG: 45.4%/97/44/53         | TG: 83.1%/89/74/15<br>CG: 55.0%/80/44/36 |
| SENZA-RCT: Kapural 2015 (34) | RCT (open-label)               | 10 kHz SCS           | t-SCS              | 6 Mo           | Back pain  | TG: 67.3%/101/68/33<br>CG: 42.8%/97/42/55         | TG: 76.4%/89/68/21<br>CG: 51.9%/80/42/38 |
| SENZA-RCT: Kapural 2015 (34) | RCT (open-label)               | 10 kHz SCS           | t-SCS              | 6 Mo           | Leg pain   | TG: 71.3%/101/72/29<br>CG: 44.9%/97/44/53         | TG: 80.9%/89/72/17<br>CG: 54.4%/80/44/36 |
| SENZA-RCT: Kapural 2015 (34) | RCT (open-label)               | 10 kHz SCS           | t-SCS              | 12 Mo          | Back pain  | TG: 69.3%/101/70/31<br>CG: 42.3%/97/41/56         | TG: 78.7%/89/70/19<br>CG: 51.3%/80/41/39 |

|                              |                    |                            |               |       |            |                                            |                                          |
|------------------------------|--------------------|----------------------------|---------------|-------|------------|--------------------------------------------|------------------------------------------|
| SENZA-RCT: Kapural 2015 (34) | RCT (open-label)   | 10 kHz SCS                 | t-SCS         | 12 Mo | Leg pain   | TG: 69.3%/101/70/31<br>CG: 42.3%/97/41/56  | TG: 78.7%/89/70/19<br>CG: 51.3%/80/41/39 |
| SENZA-RCT: Kapural 2016 (35) | RCT (open-label)   | 10 kHz SCS                 | t-SCS         | 24 Mo | Back pain  | TG: 64.4%/101/65/36<br>CG: 36.1%/97/35/62  | TG: 76.5%/85/65/20<br>CG: 49.3%/71/35/36 |
| SENZA-RCT: Kapural 2016 (35) | RCT (open-label)   | 10 kHz SCS                 | t-SCS         | 24 Mo | Leg pain   | TG: 61.4%/101/62/39<br>CG: 36.1%/97/35/62  | TG: 72.9%/85/62/23<br>CG: 49.3%/71/35/36 |
| SUNBURST: Deer 2018 (40)     | RCOT (open-label)  | Burst stim.                | t-SCS         | 3 Mo  | Comb. pain | TG: 39.0%/100/39/61<br>CG: 32.0%/100/32/68 | TG: 40.6%/96/39/57<br>CG: 33.3%/96/32/64 |
| SURF: Bolash 2019 (36)       | RCT (open-label)   | Externally powered kHz SCS | 10 10-1500 Hz | 6 Mo  | Back pain  | TG: 70.0%/50/35/15<br>CG: 57.1%/49/28/21   | TG: 92.1%/38/35/3<br>CG: 82.4%/34/28/6   |
| PROMISE: Rigoard 2019 (37)   | RCT (open-label)   | t-SCS + OMM                | OMM           | 6 Mo  | Back pain  | TG: 13.6%/110/15/95<br>CG: 4.6%/108/5/103  | TG: 16.3%/92/15/77<br>CG: 4.8%/104/5/99  |
| PROMISE: Rigoard 2019 (37)   | RCT (open-label)   | t-SCS + OMM                | OMM           | 6 Mo  | Leg pain   | TG: 30.0%/110/33/77<br>CG: 8.3%/108/9/99   | TG: 35.9%/92/33/59<br>CG: 8.7%/104/9/95  |
| WHISPER: North 2019 (41)     | RCOT (open-label)  | ≤1.2 kHz subperc. SCS      | t-SCS         | 3 Mo  | Comb. pain | TG: 38.6%/70/27/43<br>CG: 28.6%/70/20/50   | N/A*                                     |
| EVOKE: Mekhail 2019 (38)     | RCT (double-blind) | Closed-loop SCS            | t-SCS         | 3 Mo  | Comb. pain | TG: 76.1%/67/51/16<br>CG: 56.7%/67/38/29   | TG: 87.9%/58/51/7<br>CG: 71.7%/53/38/15  |
| EVOKE: Mekhail 2019 (38)     | RCT (double-blind) | Closed-loop SCS            | t-SCS         | 3 Mo  | Back pain  | TG: 74.6%/67/50/17<br>CG: 53.7%/67/36/31   | TG: 86.2%/58/50/8<br>CG: 67.9%/53/36/17  |
| EVOKE: Mekhail 2019 (38)     | RCT (double-blind) | Closed-loop SCS            | t-SCS         | 3 Mo  | Leg pain   | TG: 74.6%/67/50/17<br>CG: 64.2%/67/43/24   | TG: 86.2%/58/50/8<br>CG: 81.1%/53/43/10  |
| EVOKE: Mekhail 2019 (38)     | RCT (double-blind) | Closed-loop SCS            | t-SCS         | 12 Mo | Comb. pain | TG: 73.1%/67/49/18<br>CG: 53.7%/67/36/31   | TG: 89.1%/55/49/6<br>CG: 75.0%/48/36/12  |
| EVOKE: Mekhail 2019 (38)     | RCT (double-blind) | Closed-loop SCS            | t-SCS         | 12 Mo | Back pain  | TG: 70.1%/67/47/20<br>CG: 50.7%/67/34/33   | TG: 85.5%/55/47/8<br>CG: 70.8%/48/34/14  |
| EVOKE: Mekhail 2019 (38)     | RCT (double-blind) | Closed-loop SCS            | t-SCS         | 12 Mo | Leg pain   | TG: 73.1%/67/49/18<br>CG: 53.7%/67/36/31   | TG: 89.1%/55/49/6<br>CG: 75.0%/48/36/12  |
| Fishman 2021 (39)            | RCT (open-label)   | DTM SCS                    | t-SCS         | 12 Mo | Back pain  | TG: 53.7%/67/36/31<br>CG: 37.7%/61/23/38   | TG: 85.7%/42/36/6<br>CG: 62.2%/37/23/14  |

CMM: Conventional Medical Management; Comb: Combined; Conf: Conference; DTM: Differential Target Multiplexed; ITT: Intention-to-treat; Mo: Months; N/A: Not applicable; OMM: Optimal Medical

*Management; PP: Per-protocol; RCOT: Randomized Controlled Crossover Trial; RCT: Randomized Controlled Trial; SCS: Spinal cord stimulation; Stim: Stimulation; Subperc: Subperception; t-SCS: Traditional Spinal Cord Stimulation; Yr: Years.*

*\* Interim data analysis.*
